# Supplementary material
Source: PubMed Central journal article supplement (PMC4295084)
Supplement: supp_ptj.20130584_2013-0584.pdf [file supp_ptj.20130584_2013-0584.pdf]

**eTable 1.**

Model-Estimated Intercepts and Standard Deviations for Infants Born at Various Terms<sup>a</sup>

| Behavior                       | Group    | 1 SD Below the Estimated Mean | Estimated Mean | 1 SD Above the Estimated Mean |
|--------------------------------|----------|-------------------------------|----------------|-------------------------------|
| Holding                        | FT       | 34.3                          | 39.4           | 44.5                          |
|                                | PT no BI | 33.2                          | 38.3           | 43.4                          |
|                                | PTBI     | 33.2                          | 38.3           | 43.4                          |
| Bilateral holding              | FT       | 10.5                          | 13.1           | 16.3                          |
|                                | PT no BI | 11.1                          | 13.8           | 17.2                          |
|                                | PTBI     | 12.5                          | 15.5           | 19.3                          |
| Bouts of behavior <sup>b</sup> | FT       | 4.7                           | 5.4            | 6.3                           |
|                                | PT no BI | 3.5                           | 4.0            | 4.7                           |
|                                | PTBI     | 2.7                           | 3.2            | 3.7                           |
| Overall behavioral performance | FT       | 44.1                          | 48.1           | 52.1                          |
|                                | PT no BI | 24.5                          | 28.5           | 32.5                          |
|                                | PTBI     | 18.5                          | 22.5           | 26.5                          |
| Individual behaviors           | FT       | 40.3                          | 45.3           | 51.0                          |
|                                | PT no BI | 30.7                          | 34.6           | 38.9                          |
|                                | PTBI     | 25.2                          | 28.4           | 32.0                          |
| Combination behaviors          | FT       | 5.6                           | 7.5            | 10.0                          |
|                                | PT no BI | 3.5                           | 4.7            | 6.3                           |
|                                | PTBI     | 0.8                           | 1.0            | 1.4                           |
| Touching the body              | FT       | 77.2                          | 83.8           | 90.3                          |
|                                | PT no BI | 65.6                          | 72.1           | 78.7                          |
|                                | PTBI     | 52.0                          | 58.5           | 65.0                          |
| Looking                        | FT       | 5.4                           | 6.8            | 8.6                           |
|                                | PT no BI | 5.7                           | 7.2            | 9.1                           |
|                                | PTBI     | 4.8                           | 6.0            | 7.6                           |
| Looking while acting           | FT       | 0                             | 0              | 0                             |
|                                | PT no BI | 0                             | 0              | 0                             |
|                                | PTBI     | 0                             | 0              | 0                             |
| Squeezing                      | FT       | 0.9                           | 1.4            | 2.1                           |
|                                | PT no BI | 0.4                           | 0.7            | 1.1                           |
|                                | PTBI     | 0                             | 0              | 0                             |
| Throwing                       | FT       | 0                             | 0              | 0                             |
|                                | PT no BI | 0                             | 0              | 0                             |
|                                | PTBI     | 0                             | 0              | 0                             |
| Banging                        | FT       | 0.4                           | 0.8            | 1.6                           |
|                                | PT no BI | 0                             | 0              | 0.1                           |
|                                | PTBI     | 0                             | 0              | 0                             |
| Cyclical movement              | FT       | 2.5                           | 3.9            | 6.0                           |
|                                | PT no BI | 2.8                           | 4.3            | 6.8                           |
|                                | PTBI     | 0                             | 0              | 0                             |
| Fingering                      | FT       | 0.2                           | 0.3            | 0.5                           |
|                                | PT no BI | 0.5                           | 0.8            | 1.3                           |
|                                | PTBI     | 0                             | 0.1            | 0.5                           |
| Manipulation                   | FT       | 0.3                           | 0.9            | 2.9                           |
|                                | PT no BI | 0.4                           | 1.1            | 3.5                           |
|                                | PTBI     | 0.3                           | 1.0            | 3.0                           |

<sup>a</sup> Values are reported as percentages, unless otherwise indicated. There was not enough variability in the intercepts for the looking while acting and throwing variables for variances to be calculated for the model-estimated intercepts. FT=full-term, PT no BI=preterm without significant brain injury, PTBI=preterm with significant brain injury.

<sup>b</sup> Values are reported as counts per minute.

## Impaired Object Exploration Behaviors in Infants Born Preterm

**eTable 2.**

Raw Data Means and Standard Errors of the Mean (SEM) for Each Behavior Over Time for Infants Born at Various Terms<sup>a</sup>

| Behavior                       | Group    | Value     | Corrected Age (mo) |      |      |      |      |      |      |      |      |
|--------------------------------|----------|-----------|--------------------|------|------|------|------|------|------|------|------|
|                                |          |           | 0                  | 1.5  | 3    | 4    | 6    | 9    | 12   | 18   | 24   |
| Holding                        | FT       | $\bar{X}$ | 39.9               | 45.3 | 64.6 | 74.8 | 84.2 | 84.3 | 77.2 | 78.5 | 74.1 |
|                                |          | SEM       | 5.3                | 3.3  | 3.5  | 2.0  | 2.2  | 3.6  | 4.0  | 5.1  | 3.4  |
|                                | PT no BI | $\bar{X}$ | 45.4               | 44.3 | 59.4 | 70.7 | 84.7 | 89.5 | 80.8 | 80.6 | 83.3 |
|                                |          | SEM       | 6.1                | 4.4  | 3.1  | 1.9  | 1.9  | 2.1  | 4.6  | 3.9  | 3.7  |
|                                | PTBI     | $\bar{X}$ | 41.8               | 49.0 | 57.2 | 69.2 | 84.4 | 78.1 | 73.6 | 70.4 | 75.8 |
|                                |          | SEM       | 4.9                | 5.3  | 7.7  | 7.1  | 5.7  | 4.4  | 9.8  | 7.7  | 11.6 |
| Bilateral holding              | FT       | $\bar{X}$ | 2.9                | 1.3  | 7.9  | 25.2 | 47.1 | 43.0 | 56.6 | 54.8 | 57.0 |
|                                |          | SEM       | 2.1                | 0.8  | 1.8  | 4.2  | 3.2  | 2.9  | 3.11 | 3.4  | 1.4  |
|                                | PT no BI | $\bar{X}$ | 4.9                | 1.0  | 7.2  | 16.9 | 43.9 | 48.0 | 44.8 | 57.1 | 53.9 |
|                                |          | SEM       | 4.9                | 1.0  | 2.6  | 3.4  | 5.1  | 4.0  | 2.9  | 2.8  | 3.9  |
|                                | PTBI     | $\bar{X}$ | 0                  | 0    | 0.8  | 13.5 | 36.5 | 29.0 | 37.0 | 41.9 | 59.8 |
|                                |          | SEM       | 0                  | 0    | 0.6  | 6.2  | 13.4 | 9.2  | 12.3 | 6.7  | 2.2  |
| Bouts of behavior <sup>b</sup> | FT       | $\bar{X}$ | 6.4                | 7.2  | 12.1 | 20.1 | 34.7 | 25.4 | 30.0 | 24.3 | 29.5 |
|                                |          | SEM       | 1.9                | 0.8  | 1.1  | 2.0  | 1.7  | 1.5  | 1.4  | 1.9  | 1.3  |
|                                | PT no BI | $\bar{X}$ | 3.3                | 6.2  | 10.3 | 16.6 | 27.9 | 27.3 | 28.6 | 26.9 | 27.8 |
|                                |          | SEM       | 0.6                | 1.0  | 1.1  | 1.4  | 1.6  | 2.4  | 2.2  | 2.0  | 2.2  |
|                                | PTBI     | $\bar{X}$ | 2.5                | 7.2  | 9.9  | 15.4 | 23.8 | 34.2 | 31.5 | 30.4 | 22.5 |
|                                |          | SEM       | 0.5                | 0.7  | 2.1  | 2.3  | 4.3  | 3.9  | 5.6  | 5.3  | 4.5  |
| Overall behavioral performance | FT       | $\bar{X}$ | 44.4               | 50.7 | 63.7 | 70.8 | 74.7 | 66.1 | 66.8 | 57.9 | 64.2 |
|                                |          | SEM       | 7.9                | 3.8  | 3.3  | 3.1  | 1.4  | 2.6  | 2.4  | 3.3  | 5.2  |
|                                | PT no BI | $\bar{X}$ | 23.7               | 38.1 | 53.7 | 66.8 | 76.5 | 73.1 | 64.3 | 62.7 | 61.1 |
|                                |          | SEM       | 4.9                | 5.1  | 4.4  | 3.5  | 92.1 | 3.3  | 2.6  | 2.9  | 3.8  |
|                                | PTBI     | $\bar{X}$ | 22.3               | 38.3 | 46.0 | 55.1 | 70.7 | 71.1 | 69.9 | 68.1 | 65.8 |
|                                |          | SEM       | 8.6                | 11.0 | 6.4  | 7.6  | 8.9  | 4.0  | 3.1  | 6.2  | 2.4  |
| Individual behaviors           | FT       | $\bar{X}$ | 34.9               | 47.3 | 55.6 | 49.5 | 51.3 | 50.4 | 53.4 | 43.5 | 46.4 |
|                                |          | SEM       | 6.1                | 3.3  | 2.9  | 2.7  | 1.2  | 2.4  | 1.9  | 1.3  | 2.8  |
|                                | PT no BI | $\bar{X}$ | 23.5               | 38.2 | 48.6 | 51.4 | 52.3 | 56.3 | 53.4 | 49.9 | 45.6 |
|                                |          | SEM       | 4.8                | 5.3  | 3.3  | 1.9  | 1.9  | 2.8  | 2.2  | 1.9  | 2.7  |
|                                | PTBI     | $\bar{X}$ | 22.3               | 38.1 | 40.6 | 39.5 | 53.6 | 53.7 | 52.3 | 56.1 | 52.5 |
|                                |          | SEM       | 8.6                | 9.9  | 6.3  | 4.9  | 5.6  | 3.2  | 2.1  | 3.9  | 4.4  |
| Combination behaviors          | FT       | $\bar{X}$ | 6.1                | 2.6  | 8.4  | 21.5 | 23.3 | 15.7 | 13.3 | 14.4 | 17.8 |
|                                |          | SEM       | 3.9                | 0.8  | 1.4  | 1.9  | 1.9  | 2.2  | 1.7  | 2.1  | 2.0  |
|                                | PT no BI | $\bar{X}$ | 0.2                | 0.7  | 7.8  | 17.8 | 25.1 | 15.8 | 11.5 | 12.8 | 15.6 |
|                                |          | SEM       | 0.2                | 0.3  | 2.0  | 2.2  | 1.7  | 2.6  | 1.5  | 1.8  | 2.4  |
|                                | PTBI     | $\bar{X}$ | 0                  | 0.3  | 3.9  | 11.4 | 17.5 | 20.8 | 14.4 | 12.0 | 13.3 |
|                                |          | SEM       | 0                  | 0.2  | 1.7  | 3.4  | 4.7  | 4.7  | 3.6  | 2.4  | 4.0  |
| Touching the body              | FT       | $\bar{X}$ | 71.4               | 67.1 | 70.1 | 60.7 | 40.1 | 23.2 | 20.1 | 20.1 | 19.0 |
|                                |          | SEM       | 5.1                | 3.7  | 2.6  | 3.1  | 2.9  | 3.1  | 3.2  | 2.7  | 3.3  |
|                                | PT no BI | $\bar{X}$ | 65.1               | 52.4 | 61.1 | 59.6 | 42.0 | 23.4 | 13.8 | 18.3 | 24.6 |
|                                |          | SEM       | 7.5                | 5.7  | 3.3  | 2.8  | 3.3  | 4.3  | 2.8  | 3.3  | 4.6  |
|                                | PTBI     | $\bar{X}$ | 61.5               | 51.6 | 48.9 | 47.5 | 34.3 | 30.3 | 20.4 | 14.5 | 11.1 |
|                                |          | SEM       | 14.7               | 9.0  | 5.8  | 6.5  | 7.3  | 10.8 | 7.9  | 4.3  | 7.1  |
| Looking                        | FT       | $\bar{X}$ | 0.6                | 0.8  | 2.3  | 14.7 | 23.6 | 33.7 | 41.6 | 40.7 | 48.3 |
|                                |          | SEM       | 0.6                | 0.5  | 0.8  | 2.5  | 2.5  | 3.3  | 2.3  | 2.8  | 0.4  |
|                                | PT no BI | $\bar{X}$ | 0                  | 0.7  | 3.3  | 11.7 | 29.3 | 36.8 | 39.2 | 37.7 | 40.4 |
|                                |          | SEM       | 0                  | 0.5  | 1.5  | 2.8  | 4.1  | 3.2  | 3.0  | 2.4  | 4.0  |
|                                | PTBI     | $\bar{X}$ | 0                  | 0.2  | 2.4  | 8.8  | 25.9 | 40.4 | 41.3 | 44.4 | 53.7 |
|                                |          | SEM       | 0                  | 0.2  | 1.6  | 4.5  | 7.5  | 5.1  | 6.4  | 8.1  | 5.1  |

(Continued)

Impaired Object Exploration Behaviors in Infants Born Preterm

eTable 2.  
Continued

| Behavior              | Group    | Value     | Corrected Age (mo) |     |     |     |      |      |      |      |      |
|-----------------------|----------|-----------|--------------------|-----|-----|-----|------|------|------|------|------|
|                       |          |           | 0                  | 1.5 | 3   | 4   | 6    | 9    | 12   | 18   | 24   |
| Looking while acting  | FT       | $\bar{X}$ | 0.1                | 0.6 | 1.5 | 8.0 | 9.7  | 10.7 | 10.9 | 12.4 | 16.4 |
|                       |          | SEM       | 0.1                | 0.5 | 0.6 | 1.7 | 1.2  | 1.6  | 1.8  | 1.7  | 0.1  |
|                       | PT no BI | $\bar{X}$ | 0                  | 0   | 0.9 | 5.9 | 11.4 | 11.5 | 9.2  | 9.7  | 13.2 |
|                       |          | SEM       | 0                  | 0   | 0.4 | 1.7 | 1.7  | 2.1  | 1.3  | 1.2  | 2.0  |
|                       | PTBI     | $\bar{X}$ | 0                  | 0   | 0.6 | 3.7 | 7.4  | 16.2 | 14.8 | 10.8 | 12.6 |
|                       |          | SEM       | 0                  | 0   | 0.4 | 1.9 | 3.0  | 5.3  | 4.0  | 2.2  | 3.8  |
| Squeezing             | FT       | $\bar{X}$ | 0                  | 0.3 | 0.7 | 0.5 | 0.3  | 0.6  | 1.4  | 1.1  | 3.4  |
|                       |          | SEM       | 0                  | 0.2 | 0.4 | 0.2 | 0.1  | 0.6  | 0.5  | 0.5  | 0.6  |
|                       | PT no BI | $\bar{X}$ | 0                  | 0   | 0.7 | 1.1 | 0.7  | 0.3  | 1.3  | 2.2  | 2.5  |
|                       |          | SEM       | 0                  | 0   | 0.3 | 0.5 | 0.2  | 0.1  | 0.5  | 0.6  | 0.5  |
|                       | PTBI     | $\bar{X}$ | 0                  | 0   | 0   | 0.1 | 0.3  | 0.9  | 2.4  | 3.9  | 2.5  |
|                       |          | SEM       | 0                  | 0   | 0   | 0.1 | 0.3  | 0.5  | 1.3  | 1.2  | 1.2  |
| Throwing <sup>b</sup> | FT       | $\bar{X}$ | 0                  | 0   | 0   | 0   | 0    | 0.5  | 1.8  | 1.2  | 1.9  |
|                       |          | SEM       | 0                  | 0   | 0   | 0   | 0    | 0.4  | 0.7  | 0.4  | 0.9  |
|                       | PT no BI | $\bar{X}$ | 0                  | 0   | 0   | 0   | 0    | 0    | 0.3  | 1.4  | 0.9  |
|                       |          | SEM       | 0                  | 0   | 0   | 0   | 0    | 0    | 0.2  | 0.5  | 0.3  |
|                       | PTBI     | $\bar{X}$ | 0                  | 0.1 | 0   | 0   | 0    | 0.3  | 0.3  | 1.0  | 2.3  |
|                       |          | SEM       | 0                  | 0.1 | 0   | 0   | 0    | 0.2  | 0.3  | 0.8  | 2.1  |
| Banging               | FT       | $\bar{X}$ | 0                  | 0.2 | 0.1 | 1.5 | 6.0  | 2.0  | 1.6  | 1.1  | 0.9  |
|                       |          | SEM       | 0                  | 0.2 | 0.1 | 0.9 | 1.4  | 0.8  | 0.5  | 0.4  | 0    |
|                       | PT no BI | $\bar{X}$ | 0                  | 0   | 0.1 | 0.5 | 1.6  | 2.0  | 1.9  | 0.8  | 0.9  |
|                       |          | SEM       | 0                  | 0   | 0.1 | 0.4 | 0.6  | 0.8  | 0.7  | 0.6  | 0.4  |
|                       | PTBI     | $\bar{X}$ | 0                  | 0   | 0.3 | 0   | 0.5  | 2.7  | 0.7  | 2.2  | 0    |
|                       |          | SEM       | 0                  | 0   | 0.3 | 0   | 0.3  | 0.9  | 0.4  | 2.2  | 0    |
| Cyclical movement     | FT       | $\bar{X}$ | 0.7                | 1.2 | 1.6 | 1.6 | 1.5  | 3.5  | 4.2  | 3.5  | 2.7  |
|                       |          | SEM       | 0.7                | 0.6 | 0.5 | 0.9 | 0.5  | 0.9  | 0.9  | 0.8  | 0.5  |
|                       | PT no BI | $\bar{X}$ | 0                  | 0.7 | 1.1 | 2.6 | 2.5  | 3.4  | 4.6  | 4.2  | 3.2  |
|                       |          | SEM       | 0                  | 0.6 | 0.5 | 1.4 | 0.8  | 1.1  | 1.1  | 1.0  | 1.0  |
|                       | PTBI     | $\bar{X}$ | 0                  | 0   | 0   | 0.4 | 1.4  | 2.1  | 6.1  | 3.6  | 3.3  |
|                       |          | SEM       | 0                  | 0   | 0   | 0.3 | 0.8  | 1.9  | 4.8  | 1.5  | 1.4  |
| Fingering             | FT       | $\bar{X}$ | 0.1                | 0.3 | 0.7 | 1.7 | 2.2  | 4.1  | 2.0  | 2.4  | 1.5  |
|                       |          | SEM       | 0.1                | 0.3 | 0.2 | 0.4 | 0.4  | 0.5  | 1.0  | 0.4  | 0.1  |
|                       | PT no BI | $\bar{X}$ | 0.1                | 0.6 | 1.1 | 2.4 | 3.5  | 3.1  | 2.1  | 2.4  | 2.3  |
|                       |          | SEM       | 0.1                | 0.5 | 0.3 | 0.6 | 0.7  | 0.9  | 0.7  | 0.6  | 0.8  |
|                       | PTBI     | $\bar{X}$ | 0                  | 0   | 0.6 | 0.9 | 2.1  | 2.0  | 0.7  | 1.4  | 2.7  |
|                       |          | SEM       | 0                  | 0   | 0.3 | 0.4 | 0.7  | 1.1  | 0.5  | 0.7  | 1.7  |
| Manipulation          | FT       | $\bar{X}$ | 0                  | 0   | 0.1 | 0.3 | 1.3  | 1.2  | 2.7  | 4.1  | 6.4  |
|                       |          | SEM       | 0                  | 0   | 0.1 | 0.1 | 0.3  | 0.3  | 0.6  | 0.7  | 1.1  |
|                       | PT no BI | $\bar{X}$ | 0                  | 0   | 0.2 | 0.2 | 1.3  | 1.7  | 2.1  | 3.0  | 4.9  |
|                       |          | SEM       | 0                  | 0   | 0.2 | 0.2 | 0.3  | 0.5  | 0.6  | 0.7  | 1.2  |
|                       | PTBI     | $\bar{X}$ | 0                  | 0   | 0   | 0.7 | 0.9  | 0.2  | 2.4  | 1.4  | 2.1  |
|                       |          | SEM       | 0                  | 0   | 0   | 0.6 | 0.5  | 0.1  | 1.7  | 0.4  | 1.0  |

<sup>a</sup> Values are reported as percentages. Holding values are percentages of the potential assessment time. Unless otherwise specified, other values are normalized by the total holding time at each visit. FT=full-term, PT no BI=preterm without significant brain injury, PTBI=preterm with significant brain injury.

<sup>b</sup> Values are reported as counts per minute.

## Impaired Object Exploration Behaviors in Infants Born Preterm

**eTable 3.**

Analyses of Whether Infants Born at Various Terms Exhibited Behaviors Differently With Objects Expected to Elicit Different Levels of Behavior<sup>a</sup>

| Behavior                           | Group                           | Statistic | Corrected Age (mo) |        |        |        |        |        |        |        |        |        |
|------------------------------------|---------------------------------|-----------|--------------------|--------|--------|--------|--------|--------|--------|--------|--------|--------|
|                                    |                                 |           | 0                  | 1.5    | 3      | 4      | 6      | 9      | 12     | 18     | 24     |        |
| Overall behavioral performance     | FT                              | $t_{21}$  | 4.88               | 5.55   | 6.39   | 6.66   | 7.48   | 6.67   | 5.12   | 4.72   | 5.01   |        |
|                                    |                                 | $P$       | <.0001             | <.0001 | <.0001 | <.0001 | <.0001 | <.0001 | <.0001 | <.0001 | <.0001 | <.0001 |
|                                    |                                 | $r$       | .73                | .77    | .81    | .82    | .85    | .82    | .75    | .72    | .74    |        |
|                                    |                                 | CI lower  | 6.30               | 5.26   | 4.64   | 4.30   | 3.57   | 2.80   | 2.43   | 2.83   | 3.65   |        |
|                                    |                                 | CI upper  | 7.88               | 6.83   | 6.22   | 5.87   | 5.15   | 4.37   | 4.01   | 4.40   | 5.23   |        |
|                                    | PT no BI                        | $t_{21}$  | 6.45               | 6.72   | 7.17   | 7.49   | 7.98   | 8.44   | 8.40   | 6.88   | 5.09   |        |
|                                    |                                 | $P$       | <.0001             | <.0001 | <.0001 | <.0001 | <.0001 | <.0001 | <.0001 | <.0001 | <.0001 |        |
|                                    |                                 | $r$       | .82                | .83    | .85    | .85    | .87    | .88    | .88    | .83    | .74    |        |
|                                    |                                 | CI lower  | 0.18               | 0.18   | 0.17   | 0.17   | 0.17   | 0.17   | 0.16   | 0.15   | 0.14   |        |
|                                    |                                 | CI upper  | 0.31               | 0.32   | 0.31   | 0.31   | 0.31   | 0.30   | 0.30   | 0.29   | 0.28   |        |
|                                    | PTBI                            | $t_5$     | ns                 | ns     | ns     | ns     | ns     | ns     | ns     | ns     | ns     |        |
|                                    |                                 | $P$       |                    |        |        |        |        |        |        |        |        |        |
|                                    |                                 | $r$       |                    |        |        |        |        |        |        |        |        |        |
|                                    |                                 | CI lower  |                    |        |        |        |        |        |        |        |        |        |
|                                    |                                 | CI upper  |                    |        |        |        |        |        |        |        |        |        |
|                                    | Combination behaviors: duration | FT        | $t_{21}$           | ns     | ns     | 2.92   | 3.32   | 3.83   | 4.54   | 5.34   | 6.08   | 5.3    |
|                                    |                                 |           | $P$                |        |        | .003   | .001   | .0004  | .0001  | <.0001 | <.0001 | <.0001 |
| $r$                                |                                 |           |                    |        | .54    | .59    | .64    | .70    | .77    | .80    | .77    |        |
| CI lower                           |                                 |           |                    |        | 0.03   | 0.03   | 0.01   | 0.01   | 0.01   | 0.01   | 0.01   |        |
| CI upper                           |                                 |           |                    |        | 0.06   | 0.06   | 0.05   | 0.04   | 0.04   | 0.04   | 0.04   |        |
| PT no BI                           |                                 | $t_{21}$  | ns                 | ns     | ns     | ns     | ns     | 3.62   | 3.29   | 2.38   | ns     |        |
|                                    |                                 | $P$       |                    |        |        |        |        | .0008  | .002   | .01    |        |        |
|                                    |                                 | $r$       |                    |        |        |        |        | .62    | .58    | .46    |        |        |
|                                    |                                 | CI lower  |                    |        |        |        |        | 0.13   | 0.20   | 0.32   |        |        |
|                                    |                                 | CI upper  |                    |        |        |        |        | 0.38   | 0.45   | 0.57   |        |        |
| PTBI                               |                                 | $t_5$     | ns                 | ns     | ns     | ns     | ns     | ns     | ns     | ns     | ns     |        |
|                                    |                                 | $P$       |                    |        |        |        |        |        |        |        |        |        |
|                                    |                                 | $r$       |                    |        |        |        |        |        |        |        |        |        |
|                                    |                                 | CI lower  |                    |        |        |        |        |        |        |        |        |        |
|                                    |                                 | CI upper  |                    |        |        |        |        |        |        |        |        |        |
| Combination behaviors: variability |                                 | FT        | $t_{21}$           | ns     | ns     | ns     | 2.21   | 2.87   | 3.76   | 4.29   | 4.65   | 4.52   |
|                                    |                                 |           | $P$                |        |        |        | .01    | .004   | .0005  | .0001  | <.0001 | .0001  |
|                                    | $r$                             |           |                    |        |        | .43    | .53    | .63    | .68    | .71    | .70    |        |
|                                    | CI lower                        |           |                    |        |        | 0.01   | 0.06   | 0.14   | 0.21   | 0.37   | 0.52   |        |
|                                    | CI upper                        |           |                    |        |        | 0.40   | 0.46   | 0.54   | 0.61   | 0.76   | 0.92   |        |
|                                    | PT no BI                        | $t_{21}$  | ns                 | ns     | ns     | ns     | 2.47   | 3.62   | 3.29   | ns     | ns     |        |
|                                    |                                 | $P$       |                    |        |        |        | .01    | .0007  | .001   |        |        |        |
|                                    |                                 | $r$       |                    |        |        |        | .47    | .62    | .58    |        |        |        |
|                                    |                                 | CI lower  |                    |        |        |        | 0.06   | 0.03   | 0.03   |        |        |        |
|                                    |                                 | CI upper  |                    |        |        |        | 0.20   | 0.18   | 0.17   |        |        |        |
|                                    | PTBI                            | $t_5$     | ns                 | ns     | ns     | ns     | ns     | ns     | ns     | ns     | ns     |        |
|                                    |                                 | $P$       |                    |        |        |        |        |        |        |        |        |        |
|                                    |                                 | $r$       |                    |        |        |        |        |        |        |        |        |        |
|                                    |                                 | CI lower  |                    |        |        |        |        |        |        |        |        |        |
|                                    |                                 | CI upper  |                    |        |        |        |        |        |        |        |        |        |

(Continued)

Impaired Object Exploration Behaviors in Infants Born Preterm

eTable 3.  
Continued

| Behavior          | Group    | Statistic | Corrected Age (mo) |        |        |        |        |        |        |        |        |       |
|-------------------|----------|-----------|--------------------|--------|--------|--------|--------|--------|--------|--------|--------|-------|
|                   |          |           | 0                  | 1.5    | 3      | 4      | 6      | 9      | 12     | 18     | 24     |       |
| Bilateral holding | FT       | $t_{21}$  | ns                 | ns     | ns     | ns     | ns     | ns     | 2.99   | 3.75   | 3.60   | ns    |
|                   |          | $P$       |                    |        |        |        |        |        | .003   | .0005  | .0005  |       |
|                   |          | $r$       |                    |        |        |        |        |        | .55    | .63    | .62    |       |
|                   |          | CI lower  |                    |        |        |        |        |        | 0.08   | 0.15   | 0.08   |       |
|                   |          | CI upper  |                    |        |        |        |        |        | 0.38   | 0.46   | 0.39   |       |
|                   | PT no BI | $t_{21}$  | ns                 | ns     | ns     | ns     | ns     | ns     | ns     | 2.92   | 2.90   | ns    |
|                   |          | $P$       |                    |        |        |        |        |        |        | .004   | .004   |       |
|                   |          | $r$       |                    |        |        |        |        |        |        | .54    | .53    |       |
|                   |          | CI lower  |                    |        |        |        |        |        |        | 0.01   | 0.03   |       |
|                   |          | CI upper  |                    |        |        |        |        |        |        | 0.36   | 0.39   |       |
|                   | PTBI     | $t_5$     | ns                 | ns     | ns     | ns     | ns     | ns     | ns     | ns     | ns     | ns    |
|                   |          | $P$       |                    |        |        |        |        |        |        |        |        |       |
|                   |          | $r$       |                    |        |        |        |        |        |        |        |        |       |
|                   |          | CI lower  |                    |        |        |        |        |        |        |        |        |       |
|                   |          | CI upper  |                    |        |        |        |        |        |        |        |        |       |
| Touching the body | FT       | $t_{21}$  | 4.91               | 5.61   | 5.68   | 5.52   | 4.98   | 9.29   | 9.77   | 6.77   | 4.10   |       |
|                   |          | $P$       | <.0001             | <.0001 | <.0001 | <.0001 | <.0001 | <.0001 | <.0001 | <.0001 | <.0001 | .0002 |
|                   |          | $r$       | .73                | .77    | .78    | .77    | .74    | .90    | .91    | .83    | .67    |       |
|                   |          | CI lower  | 4.12               | 4.03   | 3.95   | 3.87   | 3.75   | 3.56   | 3.37   | 2.99   | 2.68   |       |
|                   |          | CI upper  | 5.29               | 5.19   | 5.11   | 5.03   | 4.91   | 4.72   | 4.55   | 4.16   | 3.85   |       |
|                   | PT no BI | $t_{21}$  | 3.97               | 5.09   | 6.15   | 6.05   | 4.54   | 2.96   | 2.54   | 3.97   | 4.46   |       |
|                   |          | $P$       | .0003              | <.0001 | <.0001 | <.0001 | .0001  | .003   | .009   | .0003  | .0001  |       |
|                   |          | $r$       | .65                | .74    | .80    | .80    | .70    | .54    | .48    | .65    | .70    |       |
|                   |          | CI lower  | 0.45               | 0.41   | 0.32   | 0.28   | 0.22   | 0.17   | 0.16   | 0.29   | 0.60   |       |
|                   |          | CI upper  | 0.80               | 0.76   | 0.66   | 0.62   | 0.57   | 0.51   | 0.51   | 0.64   | 0.95   |       |
|                   | PTBI     | $t_5$     | ns                 | ns     | ns     | ns     | 3.16   | ns     | ns     | ns     | ns     |       |
|                   |          | $P$       |                    |        |        |        | .009   |        |        |        |        |       |
|                   |          | $r$       |                    |        |        |        | .82    |        |        |        |        |       |
|                   |          | CI lower  |                    |        |        |        | -0.20  |        |        |        |        |       |
|                   |          | CI upper  |                    |        |        |        | 0.61   |        |        |        |        |       |
| Looking           | FT       | $t_{21}$  | ns                 | ns     | ns     | ns     | ns     | 3.72   | 6.25   | 6.41   | 2.41   |       |
|                   |          | $P$       |                    |        |        |        |        | .0005  | <.0001 | <.0001 | .01    |       |
|                   |          | $r$       |                    |        |        |        |        | .63    | .81    | .81    | .47    |       |
|                   |          | CI lower  |                    |        |        |        |        | 0.17   | 0.38   | 0.46   | 0.08   |       |
|                   |          | CI upper  |                    |        |        |        |        | 0.78   | 0.99   | 1.06   | 0.68   |       |
|                   | PT no BI | $t_{21}$  | ns                 | ns     | ns     | ns     | ns     | ns     | 3.29   | 5.78   | 5.91   |       |
|                   |          | $P$       |                    |        |        |        |        |        | .003   | <.0001 | <.0001 |       |
|                   |          | $r$       |                    |        |        |        |        |        | .58    | .78    | .79    |       |
|                   |          | CI lower  |                    |        |        |        |        |        | 0.02   | 0.36   | 0.70   |       |
|                   |          | CI upper  |                    |        |        |        |        |        | 0.41   | 0.76   | 1.10   |       |
|                   | PTBI     | $t_5$     | ns                 | ns     | ns     | ns     | ns     | ns     | ns     | 3.48   | ns     |       |
|                   |          | $P$       |                    |        |        |        |        |        |        | .007   |        |       |
|                   |          | $r$       |                    |        |        |        |        |        |        | .84    |        |       |
|                   |          | CI lower  |                    |        |        |        |        |        |        | 0.20   |        |       |
|                   |          | CI upper  |                    |        |        |        |        |        |        | 0.85   |        |       |

(Continued)

## Impaired Object Exploration Behaviors in Infants Born Preterm

**eTable 3.**  
Continued

| Behavior          | Group    | Statistic | Corrected Age (mo) |     |      |      |      |       |       |       |      |
|-------------------|----------|-----------|--------------------|-----|------|------|------|-------|-------|-------|------|
|                   |          |           | 0                  | 1.5 | 3    | 4    | 6    | 9     | 12    | 18    | 24   |
| Cyclical movement | FT       | $t_{21}$  | ns                 | ns  | 2.22 | 2.30 | 2.38 | 2.37  | 2.20  | ns    | ns   |
|                   |          | $P$       |                    |     | .01  | .01  | .01  | .01   | .01   |       |      |
|                   |          | $r$       |                    |     | .44  | .45  | .46  | .46   | .43   |       |      |
|                   |          | CI lower  |                    |     | 0.55 | 0.65 | 0.83 | 1.08  | 1.35  |       |      |
|                   |          | CI upper  |                    |     | 1.24 | 1.35 | 1.52 | 1.78  | 2.05  |       |      |
|                   | PT no BI | $t_{21}$  | ns                 | ns  | ns   | ns   | ns   | 4.10  | 3.84  | 4.26  | 3.35 |
|                   |          | $P$       |                    |     |      |      |      | .0002 | .0004 | .0001 | .001 |
|                   |          | $r$       |                    |     |      |      |      | .67   | .64   | .68   | .59  |
|                   |          | CI lower  |                    |     |      |      |      | 1.32  | 0.74  | 1.01  | 0.85 |
|                   |          | CI upper  |                    |     |      |      |      | 1.82  | 1.23  | 1.51  | 1.34 |
|                   | PTBI     | $t_5$     | ns                 | ns  | ns   | ns   | ns   | ns    | 2.95  | 3.50  | 4.98 |
|                   |          | $P$       |                    |     |      |      |      |       | .01   | .006  | .001 |
|                   |          | $r$       |                    |     |      |      |      |       | .80   | .84   | .91  |
|                   |          | CI lower  |                    |     |      |      |      |       | 0.46  | 0.75  | 2.56 |
|                   |          | CI upper  |                    |     |      |      |      |       | 1.51  | 1.80  | 3.61 |
| Fingering         | FT       | $t_{21}$  | ns                 | ns  | ns   | ns   | ns   | ns    | 2.33  | ns    | ns   |
|                   |          | $P$       |                    |     |      |      |      |       | .01   |       |      |
|                   |          | $r$       |                    |     |      |      |      |       | .45   |       |      |
|                   |          | CI lower  |                    |     |      |      |      |       | 0.60  |       |      |
|                   |          | CI upper  |                    |     |      |      |      |       | 1.05  |       |      |
|                   | PT no BI | $t_{21}$  | ns                 | ns  | ns   | ns   | ns   | ns    | ns    | 2.32  | ns   |
|                   |          | $P$       |                    |     |      |      |      |       |       | .01   |      |
|                   |          | $r$       |                    |     |      |      |      |       |       | .45   |      |
|                   |          | CI lower  |                    |     |      |      |      |       |       | 0.51  |      |
|                   |          | CI upper  |                    |     |      |      |      |       |       | 0.55  |      |
|                   | PTBI     | $t_5$     | ns                 | ns  | ns   | ns   | ns   | ns    | ns    | ns    | 5.06 |
|                   |          | $P$       |                    |     |      |      |      |       |       |       | .001 |
|                   |          | $r$       |                    |     |      |      |      |       |       |       | .91  |
|                   |          | CI lower  |                    |     |      |      |      |       |       |       | 0.90 |
|                   |          | CI upper  |                    |     |      |      |      |       |       |       | 1.99 |

<sup>a</sup> Findings are reported only when significant (ns=not significant). FT=full-term, PT no BI=preterm without significant brain injury, PTBI=preterm with significant brain injury,  $r$ =effect size presented in terms of Pearson  $r$ , CI lower and CI upper=bounds of the 95% confidence interval for the difference between the means.
